1 **The non-transcranial TMS-evoked potential is an inherent source of**  
2 **ambiguity in TMS-EEG studies**

3

4 Virginia Conde<sup>1,2\*</sup>, Leo Tomasevic<sup>1\*</sup>, Irina Akopian<sup>1</sup>, Konrad Stanek<sup>1,3</sup>, Guilherme B.  
5 Saturnino<sup>1,4</sup>, Axel Thielscher<sup>1,4</sup>, Til Ole Bergmann<sup>5,6#</sup>, Hartwig Roman Siebner<sup>1,7#</sup>

6 <sup>1</sup> Danish Research Centre for Magnetic Resonance, Centre for Functional and Diagnostic  
7 Imaging and Research, Copenhagen University Hospital Hvidovre, Denmark

8 <sup>2</sup> Clinical Neuroscience Laboratory, Institute of Psychology, Norwegian University of Science  
9 and Technology, Trondheim, Norway.

10 <sup>3</sup> Cognitive Systems, Department of Applied Mathematics and Computer Science, Technical  
11 University of Denmark

12 <sup>4</sup> Center for Magnetic Resonance, Department of Electrical Engineering, Technical University of  
13 Denmark, Kgs Lyngby, Denmark

14 <sup>5</sup> Department of Neurology & Stroke, and Hertie Institute for Clinical Brain Research, Eberhard  
15 Karls University of Tübingen, Hoppe-Seyler-Str. 3, 72076 Tübingen, Germany

16 <sup>6</sup> Institute for Medical Psychology and Behavioral Neurobiology, Eberhard Karls University of  
17 Tübingen, Otfried-Müller-Straße 25, 72076 Tübingen, Germany

18 <sup>7</sup> Department of Neurology, Copenhagen University Hospital Bispebjerg, Bispebjerg Bakke 23,  
19 2400 København NV, Denmark.

20 \* These authors contributed equally to this paper.

21 # These authors share senior authorship.

22 **Corresponding author:**

23 **Hartwig R. Siebner, Head of Research**

24 **Danish Research Centre for Magnetic Resonance (DRCMR)**

25 **Center for Functional and Diagnostic Imaging and Research,**

26 **Copenhagen University Hospital Hvidovre,**

27 **Kettegård Allé 30, 2650 Hvidovre, Denmark**

28 **Tel: +45 3862 6541; Email: [hartwig.siebner@drcmr.dk](mailto:hartwig.siebner@drcmr.dk); <http://www.drcmr.dk/siebner>**

29 **Abstract (246 words)**

30 Transcranial Magnetic Stimulation (TMS) excites populations of neurons in the stimulated cortex, and the  
31 resulting activation may spread to connected brain regions. The distributed cortical response can be  
32 recorded with electroencephalography (EEG). Since TMS also stimulates peripheral sensory and motor  
33 axons and generates a loud “click” sound, the TMS-evoked EEG potential (TEP) not only reflects neural  
34 activity induced by transcranial neuronal excitation but also neural activity reflecting somatosensory and  
35 auditory processing. In 17 healthy young individuals, we systematically assessed the contribution of  
36 multisensory peripheral stimulation to TEPs using a TMS-compatible EEG system. Real TMS was  
37 delivered with a figure-of-eight coil over the left para-median posterior parietal cortex or superior frontal  
38 gyrus with the coil being oriented perpendicularly or in parallel to the target gyrus. We also recorded the  
39 EEG responses evoked by sham stimulation over the posterior parietal and superior frontal cortex,  
40 mimicking the auditory and somatosensory sensations evoked by real TMS. We applied state-of-the-art  
41 procedures to attenuate somatosensory and auditory confounds during real TMS, including the placement  
42 of a foam layer underneath the coil and auditory noise masking. Despite these precautions, the temporal  
43 and spatial features of the cortical potentials evoked by real TMS at the prefrontal and parietal site closely  
44 resembled the cortical potentials evoked by realistic sham TMS, both for early and late TEP components.  
45 Our findings stress the need to include a peripheral multisensory control stimulation in the study design to  
46 enable a dissociation between truly transcranial and non-transcranial components of TEPs.

47

## 48 **Introduction (906 words)**

49 Transcranial magnetic stimulation (TMS) produces a time-varying electric field that can directly excite  
50 neuronal populations in the cortical target area, bypassing the afferent sensory systems (Barker et al.,  
51 1985). The highly synchronized neural excitation of the target region spreads to inter-connected brain  
52 regions via the existing neuronal pathways which can then be captured with functional brain mapping  
53 techniques (Bergmann et al., 2016; Siebner et al., 2009). Electroencephalography (EEG) has been  
54 increasingly employed in recent years to measure the cortical responses evoked by focal TMS which,  
55 thanks to its excellent temporal resolution, can reveal how the local neural response spreads from the  
56 target site to functionally and structurally connected brain regions (Bergmann et al., 2016; Bortoletto et  
57 al., 2015; Ilmoniemi et al., 1997; Siebner et al., 2009).

58 TEPs vary in shape and number of components across cortical areas (Rosanova et al., 2009) and have  
59 been used to investigate cortical physiology both in health and certain neurological and psychiatric  
60 disorders (Farzan et al., 2016; Hallett et al., 2017; Kaskie and Ferrarelli, 2018; Massimini et al., 2012),  
61 with specific TEP components showing potential as clinical biomarkers (Manganotti et al., 2015).  
62 Connectivity measures have been derived from TMS-EEG data to infer how neuronal activations  
63 propagate across specific networks and how these networks change depending on different brain states  
64 (Bortoletto et al., 2015; Rosanova et al., 2009). The Perturbational Complexity Index (Casali et al., 2013),  
65 for example, reflects the spatiotemporal complexity of cortical responses to TMS and has been used as a  
66 connectivity marker for consciousness in humans (Rosanova et al., 2012). Moreover, TMS-EEG has been  
67 combined with pharmacological interventions to elucidate the mechanisms underlying the different TEP  
68 components (Darmani et al., 2016; Premoli et al., 2014a).

69 However, TMS does not only activate the human cortex transcranially. The time-varying electric field  
70 induces action potentials in myelinated axons in the extracranial tissue as well. Eddy currents evoked in  
71 the cerebrospinal fluid may also effectively stimulate proximal cranial nerves passing through foramina at  
72 the base of the skull (Schmid et al., 1995). Orthodromic action potential propagation in peripheral motor

73 axons results in twitches of cranial muscles, which not only causes muscle potentials and electrode  
74 movement artifacts in the TEP recordings (Mutanen et al., 2013), but also a twitch-induced sensory input  
75 to the brain. When stimulating the motor cortex, re-afferent somatosensory stimulation also originates  
76 from the peripheral target muscles and contributes to TEP and TMS-induced oscillatory activity (Fecchio  
77 et al., 2017; Premoli et al., 2017).

78 In addition to causing peripheral somatosensory responses, the electrical discharge in the coil produces a  
79 loud “click” sound due to the mechanical quick expansion of the copper coil when the electric current  
80 passes through it, triggering auditory evoked potentials (Nikouline et al., 1999). Earplugs alone hardly  
81 attenuate even the airborne part of the “click”, but masking noise procedures can be used to minimize  
82 auditory co-stimulation. White noise or noise adjusted to the time-varying frequency of the TMS “click”  
83 can be administered via sound-proof in-ear headphones to prevent the TMS sound to be singled out by the  
84 brain (Massimini et al., 2005). Noise making can substantially reduce auditory evoked components in the  
85 TEPs, but often no complete suppression can be achieved at sound levels bearable for the participants,  
86 and a low frequency component can still be perceivable via bone conduction (Tchumatchenko and  
87 Reichenbach, 2014; ter Braack et al., 2015). A foam layer underneath the coil can dampen bone  
88 conduction and attenuate scalp sensations caused by mechanical coil vibration. However, the  
89 effectiveness of this method varies across participants (ter Braack et al., 2015).

90 At physiologically effective stimulus intensities, TMS will always cause significant peripheral co-  
91 stimulation, producing spatiotemporally complex cortical responses that do not result from direct  
92 transcranial cortical activation. The quantity and quality of somatosensory and auditory co-activation  
93 varies from site to site and depends on stimulation intensity and coil design. Since indirect multisensory  
94 (non-transcranial) and direct transcranial brain stimulation occur simultaneously, their evoked EEG  
95 responses are superimposed and hard to disentangle. Consequently, sham conditions have been used to  
96 characterize the non-transcranial multisensory contribution to the TEP. Sham stimulation is often  
97 achieved by the TMS coil being physically distanced from the scalp or tilted (Du et al., 2017; Fuggetta et

98 al., 2008), thereby reducing the induced electric field in the cortex to a magnitude below stimulation  
99 threshold. The physical separation of the coil from the scalp preserves the airborne “click” sound but  
100 allows for little or no bone conduction and completely lacks somatosensory co-stimulation (Nikouline et  
101 al., 1999; ter Braack et al., 2015). The mere control by median nerve stimulation-evoked somatosensory  
102 potentials (Paus et al., 2001; Rosanova et al., 2009) not only lacks auditory stimulation but the evoked  
103 potentials may also not resemble those evoked by stimulating the scalp (Hashimoto, 1988). Sham TMS  
104 coils, generating only a very small electric field in the cortex, provide simultaneous somatosensory and  
105 auditory stimulation (Bonato et al., 2006; Opitz et al., 2014), but the area of stimulation is broader (Opitz  
106 et al., 2014) and somatosensory stimulation may be markedly reduced compared to real TMS (Bonato et  
107 al., 2006; Opitz et al., 2014). On the other hand, even when the transducing coil is placed on another body  
108 part such as the shoulder blade, stimulation still produced late evoked components reminiscent of those  
109 commonly seen in TEPs caused by real TMS (Herring et al., 2015).

110 This study systematically examines the contribution of multisensory co-stimulation to the TEP. We  
111 stimulated two different locations (frontal and parietal cortex) with two different coil orientations  
112 (orthogonal and parallel to the target sulcus/gyrus) and included a realistic sham condition for each  
113 location. The sham stimulation matched somatosensory and auditory co-stimulation of real TMS as  
114 closely as possible, while inducing only a subthreshold electric field in the brain. This enabled us to  
115 directly compare the EEG responses evoked by real and sham TMS. We hypothesized that non-  
116 transcranial multisensory co-stimulation makes a relevant contribution to TMS-evoked potentials. We  
117 therefore expected the spatiotemporal response patterns evoked by realistic sham and real TMS to  
118 resemble each other at both early and late latencies.

119

## 120 **Materials and methods**

### 121 *Participants*

122 The experiment was performed as part of a larger study investigating changes in connectivity during  
123 recovery from severe Traumatic Brain Injury (TBI) (see Conde et al. (2017) for more details). Seventeen  
124 healthy participants (10 females) with an age range from 19 to 31 years were included in the study of  
125 which 15 were completely naïve to TMS. The experimental procedures were approved by the Ethics  
126 committee of the Capital Region of Denmark (Region Hovedstaden). All participants gave informed  
127 written consent prior to the start of the experiment according to the declaration of Helsinki. Participants  
128 were asked to sit still and relax throughout the measurements while keeping their eyes open, and the chair  
129 was individually adjusted to achieve the most comfortable position by the use of arm, legs, and neck rests.  
130 None of the participants were using medication acting on the central nervous system by the time of the  
131 study. Information regarding hours of sleep, caffeine and tobacco intake, as well as levels of tiredness and  
132 discomfort (before and after the experiment, visual analogue scale from 0 to 10, 0 being lowest and 10  
133 being highest level) was acquired via self-report.

134

### 135 *Experimental design*

136 The experimental design is illustrated in Fig. 1. The experiment consisted of a single session per  
137 participant where both structural MRI and TMS combined with EEG (TMS-EEG) were performed.  
138 Structural MRI was always performed prior to TMS-EEG in order to acquire a T1-weighted image where  
139 the TMS target sites were individually identified and marked for online tracking by means of a frameless  
140 stereotactic neuronavigation system (Localite, St. Augustin, Germany).

141 The experiment involved focal TMS of two brain areas (frontal and parietal cortex) with three stimulation  
142 conditions per cortical target site: two real TMS conditions with the coil oriented either perpendicular or  
143 in parallel to the cortical gyrus targeted by TMS and one somatosensory-auditory sham TMS (see Fig. 1).

144 The order of the six stimulation conditions was counterbalanced across participants, but always  
145 alternating between the prefrontal and parietal stimulation site in consecutive stimulation conditions. Two  
146 target sites were chosen for stimulation, namely the left para-median superior frontal gyrus (SPG) and left  
147 para-median superior parietal lobule (SPL) to enable conceptual within-study replication by targeting two  
148 para-median cortical areas. We chose these associative cortical areas because they are commonly targeted  
149 in TMS-EEG studies on disorders or consciousness (Marinazzo et al., 2014; Napolitani et al., 2014;  
150 Rosanova et al., 2009; Rosanova et al., 2012; Sarasso et al., 2014; Storm et al., 2017). In contrast to more  
151 lateral stimulation sites, TMS of these para-median areas elicits little to no muscle twitches. The  
152 determination of the exact coil position was based on individual anatomical MRIs as described previously  
153 (Rosanova et al., 2012).

154 For each stimulation site, we included two different coil orientations for real TMS. The longitudinal axis  
155 coil was either oriented orthogonally or in parallel to the orientation of the target gyrus referred to as  
156 “orthogonal” and “parallel” real TMS condition, respectively. The orthogonal coil orientation is  
157 considered to be the most optimal coil orientation to induce the strongest electric field within the target  
158 area (Thielscher et al., 2011). In the parallel real TMS condition, the coil orientation was rotated by 90  
159 degrees relative to the orthogonal condition (counter-clockwise in the frontal hotspot and clockwise in the  
160 parietal hotspot due to physical constraints of the Neuronavigation system) with the longitudinal axis of  
161 the coil being aligned to the orientation of the gyrus.

162 We took state-of-the-art measures to reduce somatosensory and auditory TEP contamination. A thin layer  
163 of foam was placed under the coil and auditory noise masking was delivered throughout TMS  
164 measurements. Noise masking was delivered through in-ear headphones fitted inside foam earplugs (3M  
165 systems), and the masking noise was generated from the specific time-varying frequency of the coil as  
166 background noise with superimposed high-frequency coil “click” sounds as done previously (Herring et  
167 al., 2015). The sound pressure for noise masking was individually adjusted. The sound pressure was

168 gradually increased (up to maximally 95 dB) until the participant could not hear the “click” sound of the  
169 coil with the TMS coil placed on their scalp or until they had reached their upper threshold for comfort.

170 After we had adjusted subjective stimulus intensity of electric somatosensory stimulation to the perceived  
171 intensity of orthogonal real TMS, each participant was asked to report the perceived focality of  
172 somatosensory stimulation on the scalp (defined as the extent of the area of scalp where the pulse was  
173 perceived, 10 being extremely narrow and 1 being extremely broad), the perceived loudness of the coil’s  
174 “click” sound, and the perceived overall discomfort related to stimulation after each of the six conditions.  
175 Participants were asked to give a score on a visual analogue scale (VAS) ranging from 0 to 10 with 0  
176 corresponding to no perception and 10 to maximal perception.

177

### 178 *Magnetic Resonance Imaging*

179 T1-weighted and T2-weighted structural images were acquired with a 3 Tesla TRIO Siemens scanner and  
180 a 16-channel head coil (Siemens Healthcare). Whole-brain T1-weighted and T2-weighted images were  
181 obtained with three-dimensional sequences (T1-w: TR = 2300ms, TE = 2.92ms, Voxel size = 1mm<sup>3</sup>  
182 isotropic; T2-w: TR = 10000ms, TE = 52ms, Voxel size = 1x1x2 mm<sup>3</sup> isotropic). T1-weighted images  
183 were acquired to individually identify and track the TMS hotspots with frameless stereotactic  
184 neuronavigation on each participant’s macrostructure. T2-weighted images were acquired together with  
185 T1-weighted images for the offline simulation of the induced electric fields in the cortex of each  
186 individual participant given the intensity of the stimulation and the distance of the coil from the scalp in  
187 each condition (SimNIBS 2.0, <http://simnibs.de>) (Thielscher et al., 2015)). Participants were provided  
188 with earplugs and instructed to lay still and to not move in between sequences.

189



190 *Electroencephalography*

191 EEG was acquired with a TMS-compatible 64-channel system (Brain Products, 2 MR Plus 32-channel  
192 amplifiers) and a TMS-compatible EEG cap equipped with multitrodes (EasyCap, 61 equidistant  
193 multitrodes). Two multitrodes were used for EOG (below left eye, above right eye), reference was placed  
194 outside the cap on the forehead, and two ground multitrodes (one on the forehead, one over the left  
195 mastoid) were used to account for the long-lasting artifact induced by the cutaneous electric stimulation.  
196 Impedances of all electrodes were kept below 5 kOhm (Ilmoniemi and Kicic, 2010). Electrode leads were  
197 arranged orthogonal to the direction of the induced current in each condition in order to minimize TMS-  
198 induced artefacts (Sekiguchi et al., 2011).

199 Raw EEG signals were recorded with a sampling rate of 5 kHz at DC and only with an obligatory anti-  
200 aliasing low-pass filter of 1kHz (BrainVision Recorder, Brain Products, Munich, Germany). Baseline-  
201 corrected event-related potential (ERP) averages with common referencing were monitored online for  
202 visualization purposes. EEG electrode positions were digitized in each participant as an overlay of the 3D  
203 reconstructed scalp by means of a Neuronavigation system as reported previously (Herring et al., 2015).  
204 Participants were monitored to ensure that eyes were open, both by direct visual inspection and by  
205 identification of blinks in the raw EEG, and were touched at the hand in between TMS pulses as a signal  
206 to relax when muscle activity due to tonic contractions in cranial, jaw, or neck muscles was detected.

207

208 *Transcranial Magnetic Stimulation*

209 Single-pulse TMS was performed with a PowerMAG 100 magnetic stimulator and a figure-of-eight  
210 shaped PMD45 coil with an outer winding diameter of 45 mm (Mag&More, Munich, Germany). The  
211 TMS pulse had a biphasic configuration and the first phase produced an inward current into the lateral  
212 wall of the targeted gyrus in the orthogonal condition. TMS intensity was individually adjusted for each  
213 cortical target site based on the local TEP response. Intensity of stimulation was kept the same between

214 coil orientations within hotspots. We applied 50 TMS pulses at a jittered inter-trial interval (ITI) of  $2 \pm$   
215 0.4 s and measured the early (below 50 ms) peak EEG response using the average EEG signal from the  
216 channels neighboring the site of stimulation (Brain Products Visualizer, Munich, Germany). Starting with  
217 60% of the maximum stimulator output (MSO), we gradually increased TMS intensity in steps of 2%  
218 MSO until TMS induced an early TEP peak with peak-to-peak amplitude of at least 6  $\mu$ V. At this  
219 intensity, 200 pulses were delivered using the same jittered ITI as above.

220

### 221 *Somatosensory-auditory sham condition*

222 The sham condition was designed to match the multisensory stimulation caused by real TMS as closely as  
223 possible (Rossi et al., 2007). Peripheral somatosensory stimulation was generated by cutaneous electric  
224 stimulation. We applied a square pulse delivered through bipolar electrodes (distance between electrodes:  
225 25 mm), using a DS7A electric stimulator (Digitimer Ltd., Ft. Lauderdale, Florida, USA). The electrodes  
226 were attached to a plastic holder of 3.6 cm height, had a diameter of 8 mm and were previously soaked in  
227 water and fitted through holes cut in the fabric of the EEG cap. The electrical stimulus had a 200  $\mu$ s  
228 duration and a maximum compliance voltage of 200 V. Please note that prior studies using bipolar  
229 electric stimulation with small electrode diameter report that a voltage of 330 and 2000 V is needed to  
230 stimulate the cortex (Cohen and Hallett, 1988; Merton and Morton, 1980). Intensity of the electrical  
231 stimulus was individually adjusted to match the sensation on the scalp induced by real TMS over each of  
232 the target hotspots via self-report of the participants.

233 The auditory stimulation was delivered through a TMS pulse with the figure-of-eight coil placed on top of  
234 the plastic holder of the bipolar electrode. The coil was placed directly on top of the plastic holder in  
235 order to retain optimal auditory stimulation levels (air and plastic/bone conduction) when compared to  
236 real TMS (Nikouline et al., 1999). The MSO of TMS was increased by 5% to account for the coil to scalp  
237 distance with regards to the strength of the auditory stimulation. The physical separation between coil and

238 scalp ensured that no physiologically effective current was injected in the brain (Fig.1). Both, the  
239 cutaneous electrical and electromagnetic stimuli were delivered synchronously at ITIs that corresponded  
240 to the real TMS conditions using Signal software and a Micro 1401 system (Cambridge Electronic  
241 Design, Cambridge, UK).

242

### 243 *Data analyses*

#### 244 Visual analogue scales

245 Subjectively perceived focality of somatosensory stimulation, loudness of the “click” sound, and overall  
246 discomfort were recorded as individual scores on a VAS from 0 to 10. The self-reported scores were  
247 analyzed with R software (version 3.4.1.; <https://www.r-project.org>). Data distribution was explored by  
248 means of Q-Q plots as well as the Shapiro-Wilk normality test (data considered normally distributed if  $p$   
249  $> .05$  and Q-Q plots show a linear fit). Since data were not normally distributed, Wilcoxon Signed-  
250 Ranked tests for dependent samples were used to contrast variables in a paired fashion, resulting in nine  
251 comparisons per stimulation site (three comparisons regarding focality, three regarding “click” sound, and  
252 three regarding discomfort, within and between hotspots per condition). Results were considered  
253 significant at  $p < 0.05$  after Bonferroni-Holm correction for multiple comparisons (Ludbrook, 1998).

254

#### 255 EEG pre-processing

256 The raw EEG data were pre-processed with in-house scripts programmed in Matlab (version 2016b,  
257 MathWorks, Natick, MA, USA). All the datasets were split in trial epochs starting 400 ms before and  
258 ending 1200 ms after the TMS pulse. The pulse artefact was removed from all datasets by interpolating  
259 the interval between -2 and 5 ms using cubic spline interpolation. Direct cutaneous electric stimulation  
260 over the scalp polarized the electrodes, which in turn resulted in a marked decay artefact affecting up to

261 hundreds of milliseconds of signal. This decay artefact was removed by subtracting the best fit of a two-  
262 exponential function from each trial of each channel [42, 43]. Since TMS data were not affected by the  
263 decay artefact, this procedure was only applied to the sham datasets. Apart from decay artefact removal,  
264 all the analysis steps were identical for all datasets. The data were visually inspected and all the trials  
265 affected by strong artefacts (including eye-blinks) were discarded. If there were EEG channels with bad  
266 data quality, these channels were discarded and replaced by an interpolated signal using the weighted  
267 values of the surrounding channels. Finally, all datasets were filtered using a 50 Hz notch filter and a  
268 band-pass filter (high-pass: 1 Hz; low-pass: 80 Hz), down-sampled from 5 kHz to 500 Hz, baseline-  
269 corrected from -100 to -10 ms and re-referenced to the average of all electrodes. For each condition, the  
270 trials were averaged (constructing a grand-average) and the global mean field power (GMFP) was  
271 computed.

272

### 273 Analysis of the stimulation evoked EEG responses

274 We assessed the similarity of the evoked EEG data among the two real stimulation conditions (orthogonal  
275 and parallel coil orientation) and the realistic sham stimulation condition for each stimulation site (frontal  
276 and parietal) separately. We calculated the correlation between averaged temporal traces (correlation in  
277 time) and between potential distributions across channels (correlation in space) to evaluate the similarity  
278 between two stimulation conditions in time and in space, respectively. The temporal similarity was  
279 assessed channel by channel for the time interval ranging from 20 ms up to 410 ms after the TMS pulse.  
280 The very early post-stimulation time bin (< 20ms after stimulation) was not considered to avoid the first  
281 strong TMS and electric stimulation related artefacts [28, 36, 44]. Furthermore, we performed the same  
282 analysis on shorter intervals: early (parietal stimulation site: 20-58 ms; frontal stimulation site: 20-54 ms),  
283 middle (parietal: 58-144; frontal: 54-142 ms), and late response (parietal: 144-450 ms; frontal: 142-450).  
284 The three intervals were chosen based on the peaks observed in the GMFP of all subjects. The spatial  
285 similarity was evaluated for each time point by correlating the distribution of electrical potentials. In both

286 cases, the correlation coefficients were estimated using the non-parametric Spearman method. To estimate  
287 the mean correlation among subjects both in time and space, the coefficients' z-transform (Fisher's z-  
288 transform) was averaged and subsequently inverse z-transformed. To assess the statistical significance of  
289 the correlation, we performed a pairwise t-test comparing the z-transformed coefficients before (-400 to -  
290 10 ms) and after (20 to 410 ms) the stimulation. The significance level was set to  $< 0.05$  after FDR  
291 correction for multiple comparisons.

292

### 293 Electric field simulations

294 Simulations of the electric fields generated by the TMS pulse for each participant and each condition were  
295 performed with SimNIBS software 2.0 (SimNIBS 2.0, <http://simnibs.de>) (Thielscher et al., 2015) using a  
296 realistic head model automatically generated from the individual T1-weighted and T2-weighted MR  
297 images as described elsewhere (Thielscher et al., 2015; Thielscher et al., 2011). In order to obtain average  
298 electric fields across subjects, the electric fields were interpolated in the middle of the segmented cortical  
299 gray matter, and transformed to the FSAverage template (Fischl, 2012), based on which the analysis was  
300 performed.

301

## 302 **Results**

303 All participants underwent the measurements without reporting any adverse effects. On average, both  
304 tiredness and discomfort increased significantly from the beginning to the end of the experiment. The  
305 mean VAS scores for tiredness increased from  $3.02 \pm 1.78$  to  $6.20 \pm 1.91$  and for discomfort from  $0.25 \pm$   
306  $0.71$  to  $1.85 \pm 1.79$ , respectively. Participants reported an average amount of sleep of 7.25 hours during  
307 the night before the experiment (range from 6 to 9), ensuring that no participant was sleep-deprived by the  
308 time of the study. The intensity of magnetic stimulation in the real TMS conditions was  $62.83 \pm 4.94$  % of  
309 MSO for the frontal hotspot, ranging from 53 to 75 % MSO, and  $65.94 \pm 3.62$  % of MSO for the parietal

310 hotspot, ranging from 60 to 72% MSO. For each target site, TMS was increased by 5% of MSO in the  
311 sham condition relative to the corresponding real TMS condition. The intensity of electric cutaneous  
312 stimulation was  $9.25 \pm 2.66$  mA for the frontal hotspot (ranging from 2.5 to 13) and  $10.88 \pm 3.61$  mA for  
313 the parietal hotspot (ranging from 5 to 21 mA).

314 While the intensity of the electric stimulation was individually adjusted to match the intensity of real  
315 TMS, the somatosensory perception was in all cases reported to be sharper (narrower area of the scalp)  
316 for sham than for real TMS conditions (Fig. 2). Accordingly, individual perception of focality differed  
317 significantly between all TMS conditions and their respective sham conditions (see below).

318 Using a VAS with values ranging from 0 (no “click” perception) to 10 (maximal loudness of “click”),  
319 participants rated the intensity of auditory stimulation after each stimulation condition (Fig. 2). Only one  
320 participant in our study (one data point missing,  $n = 16$  out of 17) reported complete absence of auditory  
321 perception of the “click” sound. All other participants reported VAS scores between 1 and 8, even though  
322 the volume of noise masking was adjusted to the noise level that most effectively attenuated the TMS-  
323 induced “click” sound in each participant without creating discomfort (ranging from 63 to 95 dB).

#### 324 *Frontal stimulation site*

325 For frontal stimulation, the perception of the “click” sound significantly differed between the parallel  
326 TMS condition and realistic sham condition (TMS parallel vs. Sham:  $p = 0.005$ ; VAS =  $3.82 \pm 1.45$  and  
327 VAS =  $2.74 \pm 1.49$  respectively), but not for the commonly used orthogonal TMS condition (TMS  
328 orthogonal vs. Sham:  $p = 0.28$ ). There were no significant differences between the two real TMS  
329 conditions in perception (TMS orthogonal vs. TMS parallel: focality  $p = 0.98$ ; “click” sound  $p = 0.15$ ;  
330 discomfort  $p = 0.76$ ). Focality was significantly different between each real TMS condition and sham  
331 (TMS orthogonal vs. Sham:  $p = 0.003$ ; TMS parallel vs. Sham:  $p = 0.002$ ; TMS orthogonal VAS:  $4.71 \pm$   
332  $2.17$ ; TMS parallel VAS:  $4.5 \pm 2.06$ ; Sham VAS =  $7.09 \pm 2.24$ ). Finally, discomfort was not significantly

333 different between real TMS conditions and sham (TMS orthogonal vs. Sham:  $p = 0.23$ ; TMS parallel vs.  
334 Sham:  $p = 0.36$ ).

### 335 *Parietal stimulation site*

336 For parietal stimulation, a difference in “click” perception between conditions was only present when  
337 comparing both real TMS conditions (orthogonal and parallel) (TMS orthogonal vs. TMS parallel “click”  
338 sound  $p = 0.01$ ; TMS orthogonal VAS:  $3.59 \pm 1.85$ ; TMS parallel VAS:  $2.91 \pm 1.59$ ), but not when the  
339 realistic sham condition was compared with the two real conditions (TMS orthogonal vs. Sham “click”  
340 sound  $p = 0.42$ ; TMS parallel vs. Sham “click” sound  $p = 0.29$ ). Focality was significantly different  
341 between real TMS conditions and sham only (TMS orthogonal vs. Sham:  $p = 0.005$ ; TMS parallel vs.  
342 Sham  $p = 0.004$ ; TMS orthogonal vs. TMS parallel:  $p = 0.93$ ; TMS orthogonal VAS:  $4.34 \pm 2.12$ ; TMS  
343 parallel VAS:  $4.21 \pm 2.73$ ; Sham VAS:  $6.74 \pm 2.60$ ). Perceived discomfort was not significantly different  
344 across any condition (TMS orthogonal vs. TMS parallel:  $p = 0.15$ ; TMS orthogonal vs. Sham discomfort  
345  $p = 0.09$ ; TMS parallel vs. Sham:  $p = 0.06$ ).

### 346 *Frontal versus parietal stimulation*

347 Focality, “click” sound, and discomfort were not perceived to be different across hotspots when  
348 comparing the orthogonal TMS conditions between the frontal and parietal hotspots (focality:  $p = 0.49$ ;  
349 “click” sound perception:  $p = 0.34$ ; discomfort:  $p = 0.034$ ). This was different for the parallel real TMS  
350 condition, in which “click” sound perception ( $p = 0.01$ ; TMS parallel frontal VAS:  $3.82 \pm 1.46$ ; TMS  
351 parallel parietal VAS:  $2.91 \pm 1.59$ ) and discomfort ( $p = 0.005$ ; TMS parallel frontal VAS:  $2.64 \pm 2.03$ ;  
352 TMS parallel parietal VAS:  $0.94 \pm 1.18$ ) were reported to be significantly different between the frontal  
353 and the parietal stimulation sites, in contrast to the perceived focality ( $p = 0.34$ ). Subjective ratings for the  
354 sham stimulation were not significantly different between the frontal and parietal hotspots (focality:  $p =$   
355  $0.20$ ; “click” sound:  $p = 0.17$ ; discomfort  $p = 0.86$ ).

356 Stimulation-evoked EEG responses

357 Both the grand-average of TEPs and GMFP showed significant similarity between real and sham  
358 stimulation in the temporal domain. The realistic sham condition evoked a response profile in the EEG  
359 that shared the timing and spatial distribution of major EEG peaks evoked with real TMS. Providing  
360 internal replication, this similarity was observed for the frontal and parietal stimulation site (Fig. 3 and 4).

361 The similarity of the EEG response to real and sham TMS was confirmed by a significant temporal  
362 correlation of the evoked potentials over the entire 20-450 ms interval expressed in the majority of EEG  
363 channels (Fig. 3 and 4). When the post-stimulation period was split into early, middle, and late post-  
364 stimulation intervals, the widespread correlation of the temporal EEG response at a given channel was  
365 found for all three intervals, including the relevant peak responses (Fig. 3 and 4). The strength of the  
366 temporal correlation was spatially less pronounced at shorter post-stimulus intervals. The electrodes with  
367 the highest degree of correlation clustered in the central region, corresponding to the location that  
368 maximally represented the electric potentials identified at the peaks of the GMFP (Fig. 3 and 4).

369 We also found a strong similarity of the stimulation-evoked responses in the spatial domain, with real and  
370 sham conditions being closely matched in terms of the evoked spatial response pattern. The similarity  
371 between the spatial distributions of evoked responses over the scalp was confirmed by a correlation  
372 analysis that compared the site-specific real and sham conditions using the mean EEG amplitude of each  
373 individual at each post-stimulation time point across all electrode sites (Fig. 5). For the frontal target site,  
374 the spatial correlations of the EEG response between sham and real TMS conditions were significant over  
375 the entire post-stimulation period from 20 ms to 410 ms after stimulation (Fig. 5, upper panel). For the  
376 parietal stimulation site, the spatial correlations of the EEG response between sham and real TMS were  
377 significant for most of the tested interval, interrupted by short periods where correlation did not reach  
378 significance (Fig. 5, lower panel). The peaks at which spatial correlations between real and sham  
379 stimulation reached relative maxima corresponded to the timing of the peaks identified by GMFP,



380 showing that the majority of the power was expressed by similar electrodes and at similar time points for  
381 real and sham TEPs (Fig. 5).

382 We simulated the induced electric fields in each subject to estimate the residual electromagnetic  
383 stimulation in the sham condition and to compare the estimated values to those induced by the two real  
384 TMS conditions. The average and standard deviation of the electric field distribution is illustrated in Fig.  
385 1. The maximum electric field strength averaged over all participants was comparable across real TMS  
386 conditions and well above the reported threshold for neuronal activation as recorded by EEG ( $> 50$  V/m),  
387 indicating effective cortical stimulation in the real TMS conditions (Casali et al., 2010; Casali et al., 2013;  
388 Massimini et al., 2005; Rosanova et al., 2009; Sarasso et al., 2015). For the frontal site, mean peak  
389 electric field strength was 94 V/m for the real TMS condition in which TMS induced a field that was  
390 oriented orthogonally to the target gyrus, and 86.7 V/m for a parallel coil orientation. At the parietal site,  
391 mean peak electric field strengths were 78.8 V/m for orthogonal TMS and 83.4 V/m for parallel TMS.  
392 The peak electric field strength was reduced by a factor of 4.24 (frontal) and 3.51 (parietal) with respect  
393 to real TMS (Frontal sham: 22.81 V/m; Parietal sham: 22.45 V/m), inducing a peak electric field strength  
394 well below the threshold to excite cortical neurons.

395

## 396 **Discussion**

397 In the present study, we report findings that indicate that non-transcranial multisensory co-stimulation  
398 makes a substantial contribution to TEP components commonly interpreted as the direct brain's response  
399 to the electric field induced by transcranial magnetic stimulation. When conducting combined TMS-EEG  
400 recordings, even state-of-the-art auditory noise masking and foam padding achieve only imperfect  
401 suppression of both the TMS "click"-related auditory input and the somatosensory input evoked by  
402 inductive electric stimulation of myelinated peripheral nerve axons. This is the first study to our  
403 knowledge that systematically assessed the impact of this multisensory co-stimulation on the EEG

404 activity evoked by focal TMS targeting non-motor prefrontal and posterior parietal cortex. Although we  
405 implemented state-of-the art measures to attenuate multisensory co-stimulation, the cortical potentials  
406 evoked by real and sham TMS at the prefrontal and parietal site closely resembled each other, both in  
407 temporal shape and spatial distribution. This similarity might be even greater than the one shown in the  
408 present study, because our realistic sham condition did not perfectly match the multisensory input evoked  
409 by TMS in the somatosensory domain. The close resemblance of EEG responses evoked by real TMS and  
410 realistic sham stimulation shows that the non-transcranial TEP is an inherent source of ambiguity in  
411 TMS-EEG studies. Therefore, future TMS-EEG studies need to actively show that multisensory co-  
412 stimulation was suppressed completely. This could be achieved by showing that participants perform at  
413 chance level in a two-alternative forced choice test in which they indicate whether they have received  
414 TMS or not. If participants still can dissociate between TMS and no-TMS trials after all measures are  
415 taken to suppress multisensory co-stimulation, the experimental design needs to include a realistic sham  
416 control condition which mimics multi-sensory co-stimulation as closely as possible.

417

#### 418 ***Peripherally evoked potentials evoked by multisensory stimulation***

419 Although our realistic sham stimulation did not perfectly match the multisensory input associated with  
420 real TMS, the temporal and spatial patterns of the peripherally-evoked cortical responses closely  
421 resembled the spatiotemporal patterns of TEPs evoked in the real TMS conditions. In the temporal  
422 domain, evoked peak latencies closely matched the TEP latencies evoked by real TMS at early, middle,  
423 and late post-stimulation intervals. Peak correspondence was found 40-400 ms post stimulation for the  
424 frontal target site and 70-400 ms for the parietal target side, including the classic N100 central negativity  
425 often reported in TMS-EEG studies (Du et al., 2017). Likewise, the topographical distribution of the  
426 evoked responses showed a significant correlation between sham and real TMS conditions for almost the  
427 entire 20-410 ms post-stimulation time window. Using a sham condition that consisted of real TMS  
428 delivered to the shoulder, Herring et al. (Herring et al., 2015) showed that sham stimulation induced a

429 cortical response pattern that was similar to the one evoked by real TMS over the scalp, primarily at late  
430 peak latencies (> 80 ms post stimulation). Extending these findings, we show that concurrent cranial  
431 somatosensory and auditory stimulation mimicking TMS contributes substantially to the TEP also at early  
432 latencies.

433 The similarity between realistic sham and real TMS between 20 and 80 ms after TMS can be attributed to  
434 the auditory and somatosensory features of the realistic sham condition. Firstly, inductive electric  
435 stimulation of somatosensory nerve fibers in the skin underlying the TMS coil resulted in early cortical  
436 responses which could be due to somatosensory evoked potentials (SEP). Indeed, early SEP components  
437 are already present 15 ms after peripheral trigeminal stimulation (Malcharek et al., 2011). Peripheral  
438 trigeminal stimulation has also been shown to modulate the amplitude of motor evoked potentials  
439 triggered by TMS of the motor hand area, starting 40-50 ms after peripheral stimulation (Siebner et al.,  
440 1999). Of note, the parasagittal dura mater contains myelinated fast-conducting A-beta fibers. These  
441 fibers have most likely been stimulated by real TMS in a coil orientation-dependent fashion, contributing  
442 to trigeminal somatosensory stimulation in the real TMS conditions. Inductive electric stimulation of  
443 motor nerve fibers, especially peripheral branches of the facial nerve, might have caused secondary  
444 sensory input through the induction of muscle twitches, especially for the frontal target site. Secondly,  
445 residual “click” sound perception of the TMS pulse might have evoked mid-latency peaks of the auditory  
446 evoked potentials (AEP) which are expressed already 20 ms after stimulation on the scalp (Holt and  
447 Ozdamar, 2016). A recent study showed that AEPs are reliably evoked by very short gaps during noise  
448 stimulation (Alhussaini et al., 2018). Hence, the transient “click”-induced modulation of acoustic input  
449 might effectively evoke AEPs, even in the context of a noise stimulation background.

450 We also found a close resemblance of the EEG response between sham and real TMS stimulation  
451 conditions for the later components evoked by both realistic sham and real TMS, including the N100 and  
452 P180 components, commonly described as the N1-P2 complex for both auditory and somatosensory  
453 stimulation (Goff et al., 1977; Hyde, 1997). The auditory N1-P2 peaks at frontocentral scalp electrodes as

454 a result of respectively oriented dipoles in bilateral temporal cortices (Zouridakis et al., 1998), and  
455 somatosensory components at >100 ms originate from bilateral secondary somatosensory cortices  
456 (Allison et al., 1992). The N100 is of particular interest as has been associated with GABA-B-ergic  
457 inhibition based on pharmacological interventions (Premoli et al., 2014a) and paired-pulse TMS (Opie et  
458 al., 2017; Premoli et al., 2014b; Rogasch et al., 2012), as well as by its amplitude correlation with the  
459 silent period duration (Farzan et al., 2013). Notably, Du et al. (Du et al., 2017) observed a vertex N100 of  
460 similar amplitude after TMS of prefrontal, motor, primary auditory cortices, vertex, and cerebellum, and  
461 concluded that the N100 is a ubiquitous TEP reflecting a general property of the cerebral cortex. Our  
462 findings point rather to the conclusion that the N100 observed over the vertex is at least to a great extent a  
463 non-transcranial sensory evoked potential.

464

#### 465 *Implications for studies of transcranial evoked potentials*

466 The close resemblance of TMS and sham-evoked potentials does by no means imply that specific TEP  
467 components can be always and fully explained by multisensory-evoked potentials. On the contrary, TEP  
468 recordings hold great potential for probing the local and distributed brain response to focal TMS. Since  
469 the multisensory components overlap substantially with the truly transcranial components, it is necessary  
470 to disentangle the multisensory temporal and spatial response patterns from the truly transcranially-  
471 evoked brain response. The true TEP components may become only evident after subtraction of the  
472 multisensory components or in experimental designs that effectively account for multisensory stimulation  
473 as a confound. In the study of Herring et al. (Herring et al., 2015), for instance, the authors found a left  
474 occipital N40 component following left visual cortex TMS but not multisensory sham that can hardly be  
475 explained by somatosensory or auditory co-stimulation. If the topography of a TEP component is clearly  
476 lateralized and confined to the stimulation site, such component is less likely to be the mere result of  
477 multisensory stimulation which often shows a different voltage distribution. Also, the GABA-B-receptor-  
478 mediated amplitude modulation of an N100 component lateralized to the stimulated left sensorimotor

479 cortex most likely reflects a local cortical effect at the target site (Premoli et al., 2014a). In contrast,  
480 GABA-A receptor-mediated amplitude modulations of the TEP have been reported to only be significant  
481 in the hemisphere contralateral to stimulation (Premoli et al., 2014a), and future work has to clarify the  
482 degree to which remote effects like this are due to distant scalp projections of a local dipole, a network  
483 spread of transcranially-induced activity, or pharmacological effects on multisensory cortical processing.  
484 Studies using similar GABA-mediating drugs such as benzodiazepines have consistently reported effects  
485 on AEPs and SEPs also at 100 ms, reinforcing the need to further investigate the purely transcranial  
486 effects of drugs on the TEP (Abduljawad et al., 2001; Scaife et al., 2006). Our findings are compatible  
487 with the notion that local activations at the target site may predominantly arise from transcranial  
488 stimulation particularly in the early post-stimulation period. For electrodes close to the stimulated region,  
489 the similarity between sham and real TMS was less consistent. The stronger dissimilarity of evoked  
490 responses 24-70 ms after stimulation may thus be due to the local activations after real TMS as compared  
491 to sham. Alternatively, this dissimilarity may have resulted from methodological issues since the decay  
492 artefacts resulting from transcutaneous electric stimulation were also strongest at the stimulation site, and  
493 the early post-stimulation interval included less time points than the middle or late post-stimulation  
494 intervals potentially decreasing similarity between stimulation conditions.

495 In a recent study aiming to disentangle the cortical origin of TEPs, Gosseries et al. targeted both lesioned  
496 and preserved cortical tissue in two patients with unresponsive wakefulness syndrome and multi-focal  
497 brain injury (Gosseries et al., 2015). In these patients, TEPs were completely absent when TMS directly  
498 targeted the lesioned cortex, whereas TEPs were preserved when targeting non-lesioned cortex, keeping  
499 multisensory co-stimulation comparable (Gosseries et al., 2015). These results show that a local cortical  
500 response can be evoked by TMS, but does not rule out a substantial multisensory contribution to TEPs  
501 recorded in healthy conscious individuals. It should also be noted that the first patient had additional brain  
502 stem lesions in the pons, medulla and cerebellar peduncles. These additional lesions might have blocked  
503 peripheral somatosensory input from the lesioned but not from the non-lesioned hemisphere. The second

504 patient had massive bilateral hemispheric lesions, involving auditory and somatosensory cortex  
505 bilaterally. Again, this might have prevented the occurrence of cortical responses caused by multisensory  
506 co-stimulation. It also seems that substantially higher TMS intensities were applied by Gosseries et al.  
507 and the local responses had much larger amplitudes than those normally obtained in healthy conscious  
508 individuals. Finally, in patients with disorders of consciousness it is not possible to individually adjust the  
509 sound pressure of the noise masking, potentially resulting in higher sound pressures than those tolerated  
510 by healthy individuals.

511

512 *Can auditory and somatosensory stimulation be completely suppressed in awake individuals without*  
513 *brain lesions?*

514 The evidence obtained in unresponsive patients with massive multi-focal brain damage (Gosseries et al.,  
515 2015) cannot be generalized to other studies and does not imply that those components are principally of  
516 transcranial origin when observed under different conditions. Special care needs to be taken when  
517 contrasting different physiological states (e.g., drug challenges, vigilance or attentional states, etc.) or  
518 groups (e.g., psychiatric or neurological patients) for which also a modulatory effect on auditory or  
519 somatosensory evoked potentials is conceivable or in some cases known. It has been proposed that  
520 multisensory co-stimulation does not account for any TEP components as long as both auditory and  
521 somatosensory perception are suppressed by noise masking and foam padding (Gosseries et al., 2015).  
522 Unfortunately, a complete suppression is often not achievable when studying fully awake individuals,  
523 even when following best practice procedures as reported in the present study. We implemented all  
524 measures currently advised to attenuate multisensory co-stimulation (i.e., individualized noise masking,  
525 foam padding, and stimulation sites close to the midline) and still observed multisensory evoked  
526 potentials, while almost all participants reported residual auditory and tactile perception of the TMS  
527 pulses. Unlike in other studies for which complete suppression of TMS “click” sound perception has been  
528 reported (Casula et al., 2017; Gosseries et al., 2015; Massimini et al., 2005), we systematically asked

529 participants to rate perceptual intensity after each stimulation condition. Only one participant reported  
530 complete suppression, whereas all others reported perceptual intensities between 1 and 8 (out of max 10  
531 points on the VAS) despite the maximal tolerable noise volume being used.

532 While it may be feasible to completely suppress concurrent auditory stimulation by applying noise  
533 masking at very high sound pressures, we doubt that TMS-related inductive electric stimulation of  
534 peripheral sensory and motor axons can be effectively suppressed given the biophysics of TMS. The fast-  
535 conducting myelinated peripheral axons passing through the tissue in close proximity to the induced  
536 electric field are readily excitable by TMS (Siebner et al., 1999), and these nerves are exposed to a much  
537 larger electric field than the cortex because they are located much closer to the coil. Since myelinated  
538 fast-conducting sensory trigeminal fibers are present in parasagittal parts of the dura mater (Lv et al.,  
539 2014), concurrent stimulation of dural trigeminal nerve fibers may also contribute significantly to the  
540 TEPs. Notably, these nerve fibers are not effectively stimulated by bipolar electric cutaneous stimulation  
541 due to the poor electric conductivity of the skull, so that not even our realistic sham condition would be  
542 able to control for those responses.

543 One pioneering TMS-EEG study used electric stimulation of the scalp and did not observe any  
544 somatosensory evoked cortical potentials (Paus et al., 2001), yet did neither report the precise stimulation  
545 area nor any electric artifact removal procedures. Moreover, it has been argued that SEPs should be  
546 located contralateral to stimulation (Du et al., 2017; Paus et al., 2001), concluding that the TEP was  
547 unaffected in the absence of a contralateral SEP. However, studies evoking SEPs by face stimulation  
548 (including stimulation of the trigeminal nerve) have consistently reported bilateral EEG potentials for  
549 both mechanical and electric stimulation of the face (Bennett and Jannetta, 1980; Hashimoto, 1988).  
550 While amplitudes were greater contralateral to stimulation, the authors emphasized that the response was  
551 bilateral (in contrast to those evoked by afferent nerve stimulation at the wrist, but in agreement with the  
552 cortical response distribution of face and head stimulation first reported by Penfield (1937)), and pointed  
553 out that the ipsilateral response was heavily contaminated by both muscle and stimulation artefacts. We

554 were able to record ipsilateral SEPs by using a ground electrode near the target site, reverting stimulation  
555 polarity after half of the stimulation block to cancel out the electric artefact during averaging, and  
556 applying an exponential fitting procedure to subtract the artifact. These procedures revealed an early  
557 sham-evoked potential peaking already at a latency of ~25 ms after frontal and parietal sham stimulation.  
558 This early potential most likely reflects a cortical SEP component evoked by stimulation of  
559 somatosensory trigeminal neurons (Stohr and Petruich, 1979).

560

### 561 *Impact of stimulation intensity*

562 Electric field calculations revealed that the real TMS condition resulted in a highly focal stimulation of  
563 the target region which can be attributed to the fact that we used a small figure-of-eight coil with a  
564 winding diameter of only 45 mm. Electric field estimations further revealed that focal TMS induced  
565 electric fields well above 40-50 V/m in the crown of the targeted gyrus. The induced electric gradient in  
566 the cortex is comparable to the values that have been estimated in previous TMS-EEG studies and thought  
567 to be well above the threshold for the transcranial induction of cortical responses (Casali et al., 2010;  
568 Casali et al., 2013; Massimini et al., 2005; Rosanova et al., 2009; Sarasso et al., 2015). Therefore, we are  
569 confident that our real TMS conditions were physiologically effective, inducing a highly focal electric  
570 field that was sufficient to evoke action potentials in the targeted cortex. Accordingly, the amplitudes of  
571 the TEPs were well within the range of previous TMS-EEG studies on healthy conscious individuals,  
572 ranging from 2 to 6  $\mu$ V (Herring et al., 2015; Kahkonen et al., 2005; Kerwin et al., 2018; Komssi et al.,  
573 2004; Noda et al., 2016; Premoli et al., 2014a; Rogasch et al., 2014). In contrast, induced electric field  
574 strength achieved by the corresponding sham conditions was well below threshold intensity and thus it is  
575 unlikely that it evoked action potentials in the cortical target region.

576 It is worth pointing out that previous studies have induced stronger electric fields in the cortex with larger  
577 figure-of-eight shaped coils, resulting in local responses with higher amplitudes ( $> 6 \mu$ V) (Casarotto et al.,



578 2010; Fecchio et al., 2017; Rosanova et al., 2009). It is conceivable that the relative contribution of the  
579 transcranially-evoked response is higher at stronger stimulus intensities and with larger winding of coils  
580 (which would stimulate a larger area of the scalp) with the multisensory contribution reaching saturation.  
581 However, since concurrent multisensory stimulation will also increase with TMS intensity and with non-  
582 focality of the stimulation coil, the stimulus-response relationships for both the transcranially- and  
583 peripherally-induced EEG responses need to be systematically characterized in future studies.

584

### 585 ***Conclusion***

586 Even though our realistic somatosensory-auditory sham stimulation was not optimally matching the  
587 auditory and somatosensory perception of real TMS, we demonstrated substantial similarities between  
588 real TMS and sham evoked EEG responses, both at short and long latencies for two cortical target sites.  
589 In most experimental settings, it cannot be guaranteed that auditory noise masking and foam padding are  
590 sufficient to fully remove any auditory and somatosensory evoked potential in TMS-EEG studies.  
591 Therefore, we conclude that the remaining non-transcranial evoked potentials need to be controlled for by  
592 multisensory sham conditions. The realistic multisensory sham condition needs to be carefully designed  
593 and adjusted to the specific stimulation setup and should match as closely as possible the multisensory  
594 stimulation features of real TMS. This should include a systematic psychophysical assessment and  
595 comparison of the individually experienced somatosensory and auditory perception of real and sham  
596 TMS.

597

### 598 **Acknowledgements**

599 This project has received funding from the following sources: the Capital region of Denmark (Region H,  
600 grant number R135-A4841), the Lundbeck Foundation (grant numbers R126-2012-12422, R59-A5399  
601 and R118-A11308), the Danish Council for Independent Research, section of Medical Sciences (DFF-

602 FSS, grant number DFF - 1331-00172) and the Novo Nordisk Foundation (grant number  
603 NNF14OC0011413).

604

605

606 **Conflict of interest**

607 Hartwig R. Siebner has received honoraria as speaker from Sanofi Genzyme, Denmark and as senior  
608 editor for NeuroImage from Elsevier Publishers, Amsterdam, The Netherlands and Springer Publishing,  
609 Stuttgart, Germany. He has received a research fund from Biogen-idec which is not related to this project.

610 None of the conflicts of interests are related to the present study. The other authors declare that there is no  
611 conflict of interest

612

613

614 **Figures & Figure legends**

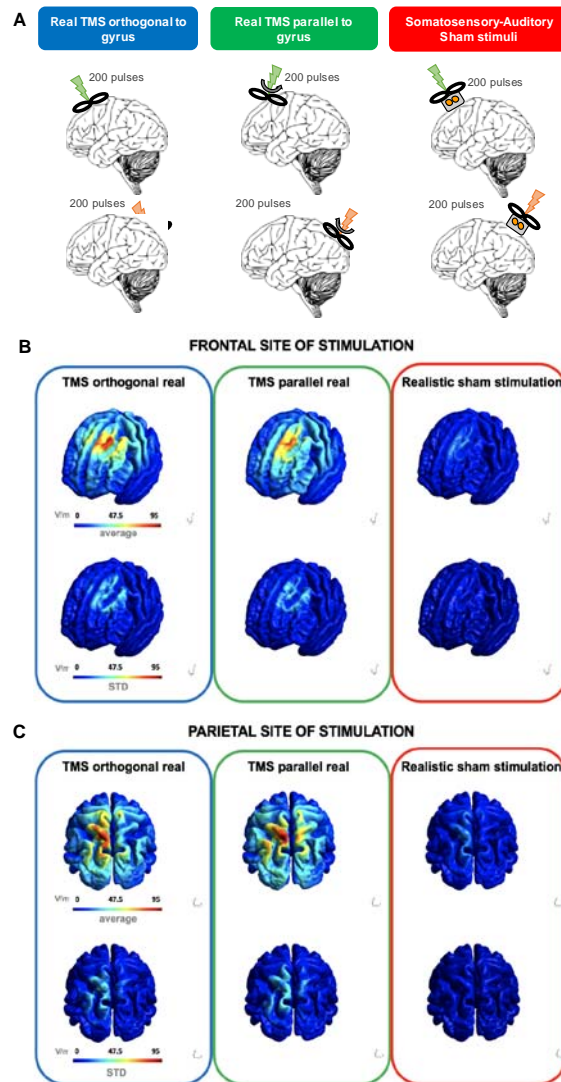

615

616 **Fig. 1. Experimental design and electric field modelling.**

617 **A.** Schematic representation of the experimental design showing the three different stimulation conditions  
618 and the two cortical target sites, namely left para-median superior frontal gyrus and left para-median  
619 superior parietal lobule. Curved arrows on the second column (TMS parallel) indicate the change of the  
620 coil angle with respect to the first column (TMS orthogonal) by 90 degrees (counter-clockwise for the  
621 frontal hotspot, clockwise for the parietal hotspot). A grey box with two orange circles inside (last  
622 column) represents the bipolar surface electrodes for electric stimulation. A total of 200 pulses were  
623 delivered per stimulation condition and cortical target. **B.** Group average of electric field maps for the  
624 frontal target site. **C.** Group average of electric field maps for the parietal target site. The color bar  
625 represents maximum strength of the electric field in V/m, ranging between 0 (blue), 47.5 (green-yellow),  
626 and a maximum of 95 (orange-red). Upper row shows the electric field strength maps across conditions.  
627 Bottom row shows the standard deviation of the strength maps per condition.

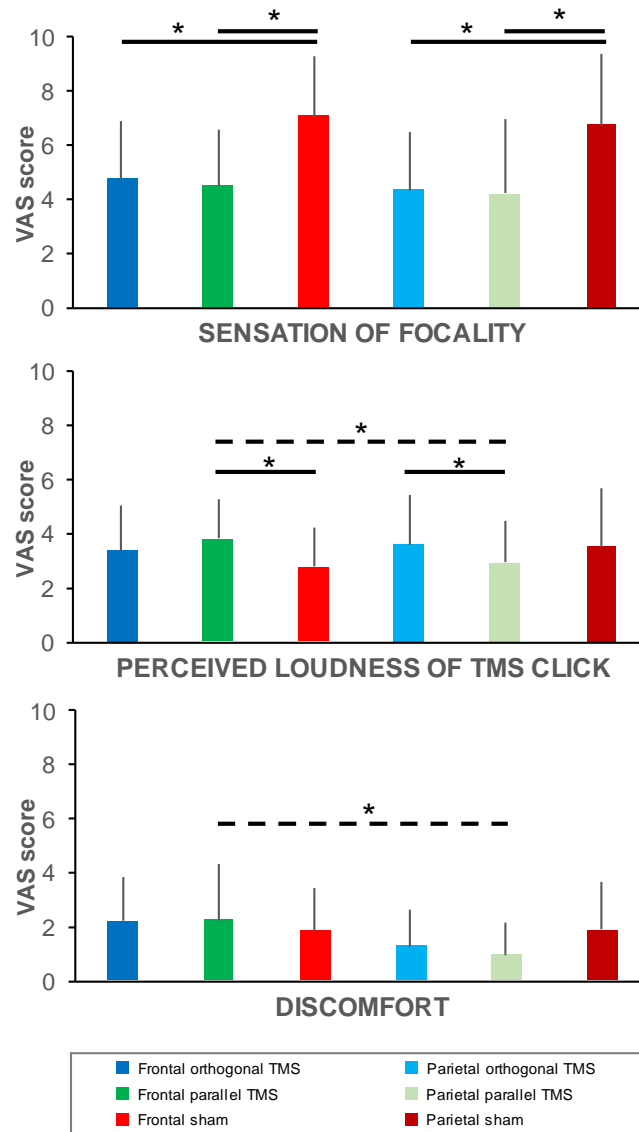

628

629 **Fig. 2. Self-reported perception of focality of stimulation (Upper panel), loudness of the perceived**  
630 **“click” sound (middle panel) and overall discomfort (lower panel).**

631 The columns represent the mean VAS scores (range: 0 to 10) and the error bars equal onefold standard  
632 deviation for each stimulation condition. The bold horizontal lines with an asterisk on top represent  
633 significant differences between two conditions for the same stimulation site (continuous lines) or between  
634 the frontal and parietal conditions (stippled line). Statistical comparisons used a Wilcoxon Signed-Ranked  
635 test with an alpha of 0.05/n (Bonferroni-Holm corrected for multiple comparisons).

636

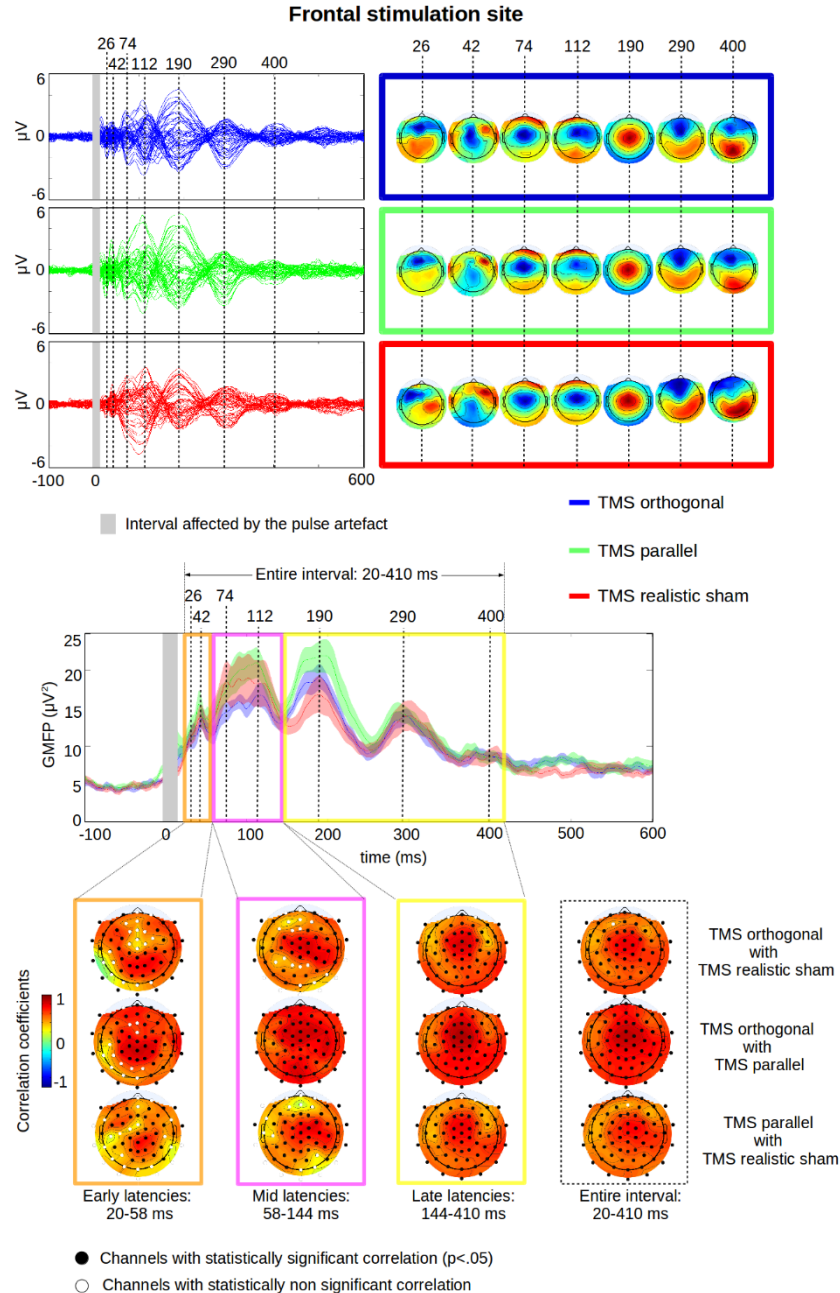

637

638 **Fig. 3. Group EEG data evoked by stimulation targeting the left paramedian frontal cortex.**Upper  
 639 panel: Grand averages of TEPs for each EEG channel and the topographic distribution of the electric  
 640 potentials of the identified peaks (maps on the right). The responses evoked by TMS delivered orthogonal  
 641 to the target gyrus are presented in blue colour. The responses evoked by TMS delivered with the coil  
 642 oriented in parallel to the target gyrus are presented in green colour. The responses evoked by the  
 643 somatosensory-auditory sham stimulation are labelled in red. Middle panel: Global mean field power  
 644 (GMFP) of the three stimulation conditions and the selection of intervals for the time correlation (early,  
 645 middle, late response and the entire interval). Lower panel: Topographic distribution of the average  
 646 correlation in the selected intervals between two of the three conditions (orthogonal real TMS vs realistic  
 647 sham TMS; orthogonal real TMS vs. parallel real TMS; parallel real TMS vs. realistic sham TMS). Only  
 648 a few channels marked as white dots showed no statistically significant correlation between conditions.

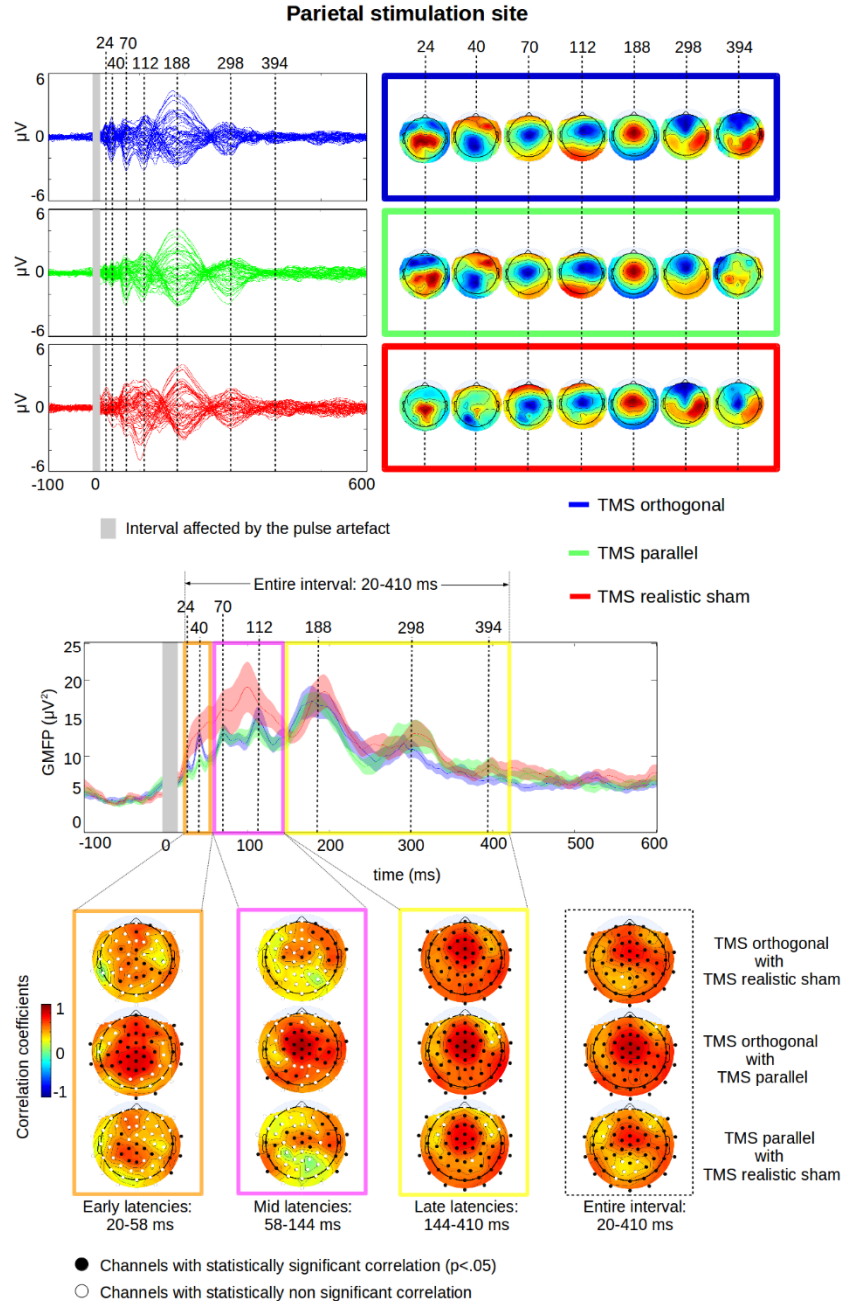

649  
650  
651  
652  
653  
654  
655  
656  
657  
658  
659

**Fig. 4. Group EEG data evoked by stimulation targeting the left paramedian parietal cortex.** Upper panel: Grand averages of TEPs for each EEG channel and the topographic distribution of the electric potentials of the identified peaks (maps on the right). The responses evoked by TMS delivered orthogonal to the target gyrus are presented in blue colour. The responses evoked by TMS delivered with the coil oriented in parallel to the target gyrus are presented in green colour. The responses evoked by the somatosensory-auditory sham stimulation are labelled in red. Middle panel: Global mean field power (GMFP) of the three stimulation conditions and the selection of intervals for the time correlation (early, middle, late response and the entire interval). Lower panel: Topographic distribution of the average correlation in the selected intervals between two of the three conditions (orthogonal real TMS vs realistic sham TMS; orthogonal real TMS vs. parallel real TMS; parallel real TMS vs. realistic sham TMS).

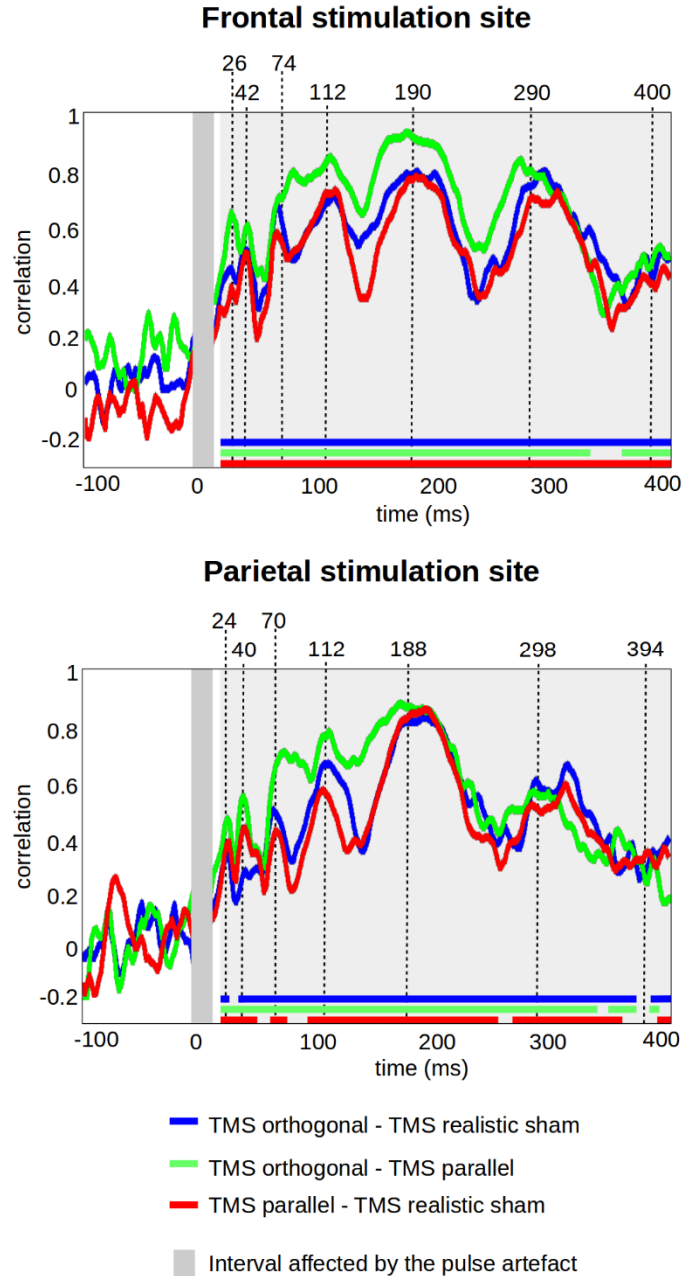

660

661 **Fig. 5. Spatial similarity of cortical responses evoked by real and sham TMS.** The correlation  
662 between the distribution of the potentials over the scalp in different conditions (orthogonal TMS/sham;  
663 orthogonal TMS/tangential TMS; tangential TMS/sham) for the frontal (upper) and parietal (lower)  
664 stimulation spot. At the bottom of each figure the statistically significant time intervals are shown for  
665 each correlation analysis as a bold timeline. The interruptions indicate periods during which correlation  
666 did not reach significance. With a few exceptions, spatial correlations were significant between conditions  
667 across the entire post-stimulation interval.

668

669 **References**

- 670 Abduljawad, K.A., Langley, R.W., Bradshaw, C.M., Szabadi, E., 2001. Effects of clonidine and diazepam on  
671 prepulse inhibition of the acoustic startle response and the N1/P2 auditory evoked potential in  
672 man. *J Psychopharmacol* 15, 237-242.
- 673 Alhussaini, K., Bohorquez, J., Delgado, R.E., Ozdamar, O., 2018. Auditory brainstem, middle and late  
674 latency responses to short gaps in noise at different presentation rates. *Int J Audiol*, 1-8.
- 675 Allison, T., McCarthy, G., Wood, C.C., 1992. The relationship between human long-latency  
676 somatosensory evoked potentials recorded from the cortical surface and from the scalp.  
677 *Electroencephalogr Clin Neurophysiol* 84, 301-314.
- 678 Barker, A.T., Jalinous, R., Freeston, I.L., 1985. Non-invasive magnetic stimulation of human motor cortex.  
679 *Lancet* 1, 1106-1107.
- 680 Bennett, M.H., Jannetta, P.J., 1980. Trigeminal evoked potentials in humans. *Electroencephalogr Clin*  
681 *Neurophysiol* 48, 517-526.
- 682 Bergmann, T.O., Karabanov, A., Hartwigsen, G., Thielscher, A., Siebner, H.R., 2016. Combining non-  
683 invasive transcranial brain stimulation with neuroimaging and electrophysiology: Current  
684 approaches and future perspectives. *Neuroimage* 140, 4-19.
- 685 Bonato, C., Miniussi, C., Rossini, P.M., 2006. Transcranial magnetic stimulation and cortical evoked  
686 potentials: a TMS/EEG co-registration study. *Clin Neurophysiol* 117, 1699-1707.
- 687 Bortoletto, M., Veniero, D., Thut, G., Miniussi, C., 2015. The contribution of TMS-EEG coregistration in  
688 the exploration of the human cortical connectome. *Neurosci Biobehav Rev* 49, 114-124.
- 689 Casali, A.G., Casarotto, S., Rosanova, M., Mariotti, M., Massimini, M., 2010. General indices to  
690 characterize the electrical response of the cerebral cortex to TMS. *Neuroimage* 49, 1459-1468.
- 691 Casali, A.G., Gosseries, O., Rosanova, M., Boly, M., Sarasso, S., Casali, K.R., Casarotto, S., Bruno, M.A.,  
692 Laureys, S., Tononi, G., Massimini, M., 2013. A theoretically based index of consciousness  
693 independent of sensory processing and behavior. *Sci Transl Med* 5, 198ra105.
- 694 Casarotto, S., Romero Lauro, L.J., Bellina, V., Casali, A.G., Rosanova, M., Pigorini, A., Defendi, S., Mariotti,  
695 M., Massimini, M., 2010. EEG responses to TMS are sensitive to changes in the perturbation  
696 parameters and repeatable over time. *PLoS ONE* 5, e10281.
- 697 Casula, E.P., Bertoldo, A., Tarantino, V., Maiella, M., Koch, G., Rothwell, J.C., Toffolo, G.M., Bisiacchi, P.S.,  
698 2017. TMS-evoked long-lasting artefacts: A new adaptive algorithm for EEG signal correction.  
699 *Clin Neurophysiol* 128, 1563-1574.
- 700 Cohen, L.G., Hallett, M., 1988. Methodology for non-invasive mapping of human motor cortex with  
701 electrical stimulation. *Electroencephalogr Clin Neurophysiol* 69, 403-411.
- 702 Conde, V., Andreasen, S.H., Petersen, T.H., Larsen, K.B., Madsen, K., Andersen, K.W., Akopian, I.,  
703 Madsen, K.H., Hansen, C.P., Poulsen, I., Kammersgaard, L.P., Siebner, H.R., 2017. Alterations in  
704 the brain's connectome during recovery from severe traumatic brain injury: protocol for a  
705 longitudinal prospective study. *BMJ Open* 7, e016286.
- 706 Darmani, G., Zipser, C.M., Bohmer, G.M., Deschet, K., Muller-Dahlhaus, F., Belardinelli, P., Schwab, M.,  
707 Ziemann, U., 2016. Effects of the Selective alpha5-GABAAR Antagonist S44819 on Excitability in  
708 the Human Brain: A TMS-EMG and TMS-EEG Phase I Study. *J Neurosci* 36, 12312-12320.
- 709 Du, X., Choa, F.S., Summerfelt, A., Rowland, L.M., Chiappelli, J., Kochunov, P., Hong, L.E., 2017. N100 as a  
710 generic cortical electrophysiological marker based on decomposition of TMS-evoked potentials  
711 across five anatomic locations. *Exp Brain Res* 235, 69-81.
- 712 Farzan, F., Barr, M.S., Hoppenbrouwers, S.S., Fitzgerald, P.B., Chen, R., Pascual-Leone, A., Daskalakis, Z.J.,  
713 2013. The EEG correlates of the TMS-induced EMG silent period in humans. *Neuroimage* 83,  
714 120-134.



- 715 Farzan, F., Vernet, M., Shafi, M.M., Rotenberg, A., Daskalakis, Z.J., Pascual-Leone, A., 2016.  
716 Characterizing and Modulating Brain Circuitry through Transcranial Magnetic Stimulation  
717 Combined with Electroencephalography. *Front Neural Circuits* 10, 73.
- 718 Fecchio, M., Pigorini, A., Comanducci, A., Sarasso, S., Casarotto, S., Premoli, I., Derchi, C.C., Mazza, A.,  
719 Russo, S., Resta, F., Ferrarelli, F., Mariotti, M., Ziemann, U., Massimini, M., Rosanova, M., 2017.  
720 The spectral features of EEG responses to transcranial magnetic stimulation of the primary  
721 motor cortex depend on the amplitude of the motor evoked potentials. *PLoS ONE* 12, e0184910.
- 722 Fischl, B., 2012. *FreeSurfer*. *Neuroimage* 62, 774-781.
- 723 Fuggetta, G., Pavone, E.F., Fiaschi, A., Manganotti, P., 2008. Acute modulation of cortical oscillatory  
724 activities during short trains of high-frequency repetitive transcranial magnetic stimulation of  
725 the human motor cortex: a combined EEG and TMS study. *Hum Brain Mapp* 29, 1-13.
- 726 Goff, G.D., Matsumiya, Y., Allison, T., Goff, W.R., 1977. The scalp topography of human somatosensory  
727 and auditory evoked potentials. *Electroencephalogr Clin Neurophysiol* 42, 57-76.
- 728 Gosseries, O., Sarasso, S., Casarotto, S., Boly, M., Schnakers, C., Napolitani, M., Bruno, M.A., Ledoux, D.,  
729 Tshibanda, J.F., Massimini, M., Laureys, S., Rosanova, M., 2015. On the Cerebral Origin of EEG  
730 Responses to TMS: Insights From Severe Cortical Lesions. *Brain Stimulation* 8, 142-149.
- 731 Hallett, M., Di Iorio, R., Rossini, P.M., Park, J.E., Chen, R., Celnik, P., Strafella, A.P., Matsumoto, H.,  
732 Ugawa, Y., 2017. Contribution of transcranial magnetic stimulation to assessment of brain  
733 connectivity and networks. *Clin Neurophysiol* 128, 2125-2139.
- 734 Hashimoto, I., 1988. Trigeminal evoked potentials following brief air puff: enhanced signal-to-noise  
735 ratio. *Ann Neurol* 23, 332-338.
- 736 Herring, J.D., Thut, G., Jensen, O., Bergmann, T.O., 2015. Attention Modulates TMS-Locked Alpha  
737 Oscillations in the Visual Cortex. *J Neurosci* 35, 14435-14447.
- 738 Holt, F., Ozdamar, O., 2016. Effects of rate (0.3-40/s) on simultaneously recorded auditory brainstem,  
739 middle and late responses using deconvolution. *Clin Neurophysiol* 127, 1589-1602.
- 740 Hyde, M., 1997. The N1 response and its applications. *Audiol Neurootol* 2, 281-307.
- 741 Ilmoniemi, R.J., Kicic, D., 2010. Methodology for Combined TMS and EEG. *Brain Topogr* 22, 233-248.
- 742 Ilmoniemi, R.J., Virtanen, J., Ruohonen, J., Karhu, J., Aronen, H.J., Naatanen, R., Katila, T., 1997. Neuronal  
743 responses to magnetic stimulation reveal cortical reactivity and connectivity. *Neuroreport* 8,  
744 3537-3540.
- 745 Kahkonen, S., Komssi, S., Wilenius, J., Ilmoniemi, R.J., 2005. Prefrontal transcranial magnetic stimulation  
746 produces intensity-dependent EEG responses in humans. *Neuroimage* 24, 955-960.
- 747 Kaskie, R.E., Ferrarelli, F., 2018. Investigating the neurobiology of schizophrenia and other major  
748 psychiatric disorders with Transcranial Magnetic Stimulation. *Schizophr Res* 192, 30-38.
- 749 Kerwin, L.J., Keller, C.J., Wu, W., Narayan, M., Etkin, A., 2018. Test-retest reliability of transcranial  
750 magnetic stimulation EEG evoked potentials. *Brain Stimul* 11, 536-544.
- 751 Komssi, S., Kahkonen, S., Ilmoniemi, R.J., 2004. The effect of stimulus intensity on brain responses  
752 evoked by transcranial magnetic stimulation. *Hum Brain Mapp* 21, 154-164.
- 753 Ludbrook, J., 1998. Multiple comparison procedures updated. *Clinical and Experimental Pharmacology*  
754 *and Physiology* 25, 1032-1037.
- 755 Lv, X., Wu, Z., Li, Y., 2014. Innervation of the cerebral dura mater. *Neuroradiol J* 27, 293-298.
- 756 Malcharek, M.J., Landgraf, J., Hennig, G., Sorge, O., Aschermann, J., Sablotzki, A., 2011. Recordings of  
757 long-latency trigeminal somatosensory-evoked potentials in patients under general anaesthesia.  
758 *Clin Neurophysiol* 122, 1048-1054.
- 759 Manganotti, P., Acler, M., Masiero, S., Del Felice, A., 2015. TMS-evoked N100 responses as a prognostic  
760 factor in acute stroke. *Funct Neurol* 30, 125-130.

- 761 Marinazzo, D., Gosseries, O., Boly, M., Ledoux, D., Rosanova, M., Massimini, M., Noirhomme, Q.,  
762 Laureys, S., 2014. Directed information transfer in scalp electroencephalographic recordings:  
763 insights on disorders of consciousness. *Clin EEG Neurosci* 45, 33-39.
- 764 Massimini, M., Ferrarelli, F., Huber, R., Esser, S.K., Singh, H., Tononi, G., 2005. Breakdown of cortical  
765 effective connectivity during sleep. *Science* 309, 2228-2232.
- 766 Massimini, M., Ferrarelli, F., Sarasso, S., Tononi, G., 2012. Cortical mechanisms of loss of consciousness:  
767 insight from TMS/EEG studies. *Arch Ital Biol* 150, 44-55.
- 768 Merton, P.A., Morton, H.B., 1980. Stimulation of the cerebral cortex in the intact human subject. *Nature*  
769 285, 227.
- 770 Mutanen, T., Maki, H., Ilmoniemi, R.J., 2013. The effect of stimulus parameters on TMS-EEG muscle  
771 artifacts. *Brain Stimul* 6, 371-376.
- 772 Napolitani, M., Bodart, O., Canali, P., Seregni, F., Casali, A., Laureys, S., Rosanova, M., Massimini, M.,  
773 Gosseries, O., 2014. Transcranial magnetic stimulation combined with high-density EEG in  
774 altered states of consciousness. *Brain Inj* 28, 1180-1189.
- 775 Nikouline, V., Ruohonen, J., Ilmoniemi, R.J., 1999. The role of the coil click in TMS assessed with  
776 simultaneous EEG. *Clin Neurophysiol* 110, 1325-1328.
- 777 Noda, Y., Cash, R.F., Zomorodi, R., Dominguez, L.G., Farzan, F., Rajji, T.K., Barr, M.S., Chen, R.,  
778 Daskalakis, Z.J., Blumberger, D.M., 2016. A combined TMS-EEG study of short-latency afferent  
779 inhibition in the motor and dorsolateral prefrontal cortex. *J Neurophysiol* 116, 938-948.
- 780 Opie, G.M., Rogasch, N.C., Goldsworthy, M.R., Ridding, M.C., Semmler, J.G., 2017. Investigating TMS-EEG  
781 Indices of Long-Interval Intracortical Inhibition at Different Interstimulus Intervals. *Brain Stimul*  
782 10, 65-74.
- 783 Opitz, A., Legon, W., Mueller, J., Barbour, A., Paulus, W., Tyler, W.J., 2014. Is sham cTBS real cTBS? The  
784 effect on EEG dynamics. *Front Hum Neurosci* 8, 1043.
- 785 Paus, T., Sipila, P.K., Strafella, A.P., 2001. Synchronization of neuronal activity in the human primary  
786 motor cortex by transcranial magnetic stimulation: an EEG study. *J Neurophysiol* 86, 1983-1990.
- 787 Penfield, W.a.B., E., 1937. Somatic motor and sensory representation in the cerebral cortex of man as  
788 studied by electrical stimulation. *Brain* 60, 389-443.
- 789 Premoli, I., Bergmann, T.O., Fecchio, M., Rosanova, M., Biondi, A., Belardinelli, P., Ziemann, U., 2017.  
790 The impact of GABAergic drugs on TMS-induced brain oscillations in human motor cortex.  
791 *Neuroimage* 163, 1-12.
- 792 Premoli, I., Castellanos, N., Rivolta, D., Belardinelli, P., Bajo, R., Zipser, C., Espenhahn, S., Heidegger, T.,  
793 Muller-Dahlhaus, F., Ziemann, U., 2014a. TMS-EEG signatures of GABAergic neurotransmission  
794 in the human cortex. *J Neurosci* 34, 5603-5612.
- 795 Premoli, I., Rivolta, D., Espenhahn, S., Castellanos, N., Belardinelli, P., Ziemann, U., Muller-Dahlhaus, F.,  
796 2014b. Characterization of GABAB-receptor mediated neurotransmission in the human cortex by  
797 paired-pulse TMS-EEG. *Neuroimage* 103, 152-162.
- 798 Rogasch, N.C., Daskalakis, Z.J., Fitzgerald, P.B., 2012. Mechanisms underlying long-interval cortical  
799 inhibition in the human motor cortex: a TMS-EEG study. *J Neurophysiol*.
- 800 Rogasch, N.C., Thomson, R.H., Farzan, F., Fitzgibbon, B.M., Bailey, N.W., Hernandez-Pavon, J.C.,  
801 Daskalakis, Z.J., Fitzgerald, P.B., 2014. Removing artefacts from TMS-EEG recordings using  
802 independent component analysis: importance for assessing prefrontal and motor cortex  
803 network properties. *Neuroimage* 101, 425-439.
- 804 Rosanova, M., Casali, A., Bellina, V., Resta, F., Mariotti, M., Massimini, M., 2009. Natural frequencies of  
805 human corticothalamic circuits. *J Neurosci* 29, 7679-7685.
- 806 Rosanova, M., Gosseries, O., Casarotto, S., Boly, M., Casali, A.G., Bruno, M.A., Mariotti, M., Boveroux, P.,  
807 Tononi, G., Laureys, S., Massimini, M., 2012. Recovery of cortical effective connectivity and  
808 recovery of consciousness in vegetative patients. *Brain* 135, 1308-1320.

- 809 Rossi, S., Ferro, M., Cincotta, M., Ulivelli, M., Bartalini, S., Miniussi, C., Giovannelli, F., Passero, S., 2007. A  
810 real electro-magnetic placebo (REMP) device for sham transcranial magnetic stimulation (TMS).  
811 Clin Neurophysiol 118, 709-716.
- 812 Sarasso, S., Boly, M., Napolitani, M., Gosseries, O., Charland-Verville, V., Casarotto, S., Rosanova, M.,  
813 Casali, A.G., Brichant, J.F., Boveroux, P., Rex, S., Tononi, G., Laureys, S., Massimini, M., 2015.  
814 Consciousness and Complexity during Unresponsiveness Induced by Propofol, Xenon, and  
815 Ketamine. Curr Biol 25, 3099-3105.
- 816 Sarasso, S., Rosanova, M., Casali, A.G., Casarotto, S., Fecchio, M., Boly, M., Gosseries, O., Tononi, G.,  
817 Laureys, S., Massimini, M., 2014. Quantifying cortical EEG responses to TMS in  
818 (un)consciousness. Clin EEG Neurosci 45, 40-49.
- 819 Scaife, J.C., Groves, J., Langley, R.W., Bradshaw, C.M., Szabadi, E., 2006. Sensitivity of late-latency  
820 auditory and somatosensory evoked potentials to threat of electric shock and the sedative drugs  
821 diazepam and diphenhydramine in human volunteers. J Psychopharmacol 20, 485-495.
- 822 Schmid, U.D., Moller, A.R., Schmid, J., 1995. Transcranial magnetic stimulation of the trigeminal nerve:  
823 intraoperative study on stimulation characteristics in man. Muscle Nerve 18, 487-494.
- 824 Sekiguchi, H., Takeuchi, S., Kadota, H., Kohno, Y., Nakajima, Y., 2011. TMS-induced artifacts on EEG can  
825 be reduced by rearrangement of the electrode's lead wire before recording. Clin Neurophysiol  
826 122, 984-990.
- 827 Siebner, H.R., Auer, C., Roeck, R., Conrad, B., 1999. Trigeminal sensory input elicited by electric or  
828 magnetic stimulation interferes with the central motor drive to the intrinsic hand muscles. Clin  
829 Neurophysiol 110, 1090-1099.
- 830 Siebner, H.R., Bergmann, T.O., Bestmann, S., Massimini, M., Johansen-Berg, H., Mochizuki, H., Bohning,  
831 D.E., Boorman, E.D., Groppa, S., Miniussi, C., Pascual-Leone, A., Huber, R., Taylor, P.C.,  
832 Ilmoniemi, R.J., De Gennaro, L., Strafella, A.P., Kahkonen, S., Kloppel, S., Frisoni, G.B., George,  
833 M.S., Hallett, M., Brandt, S.A., Rushworth, M.F., Ziemann, U., Rothwell, J.C., Ward, N., Cohen,  
834 L.G., Baudewig, J., Paus, T., Ugawa, Y., Rossini, P.M., 2009. Consensus paper: combining  
835 transcranial stimulation with neuroimaging. Brain Stimul 2, 58-80.
- 836 Stohr, M., Petruch, F., 1979. Somatosensory evoked potentials following stimulation of the trigeminal  
837 nerve in man. J Neurol 220, 95-98.
- 838 Storm, J.F., Boly, M., Casali, A.G., Massimini, M., Olcese, U., Pennartz, C.M.A., Wilke, M., 2017.  
839 Consciousness Regained: Disentangling Mechanisms, Brain Systems, and Behavioral Responses. J  
840 Neurosci 37, 10882-10893.
- 841 Tchumatchenko, T., Reichenbach, T., 2014. A cochlear-bone wave can yield a hearing sensation as well  
842 as otoacoustic emission. Nat Commun 5, 4160.
- 843 ter Braack, E.M., de Vos, C.C., van Putten, M.J., 2015. Masking the Auditory Evoked Potential in TMS-  
844 EEG: A Comparison of Various Methods. Brain Topogr 28, 520-528.
- 845 Thielscher, A., Antunes, A., Saturnino, G.B., 2015. Field modeling for transcranial magnetic stimulation: A  
846 useful tool to understand the physiological effects of TMS? Conf Proc IEEE Eng Med Biol Soc  
847 2015, 222-225.
- 848 Thielscher, A., Opitz, A., Windhoff, M., 2011. Impact of the gyral geometry on the electric field induced  
849 by transcranial magnetic stimulation. Neuroimage 54, 234-243.
- 850 Zouridakis, G., Simos, P.G., Papanicolaou, A.C., 1998. Multiple bilaterally asymmetric cortical sources  
851 account for the auditory N1m component. Brain Topogr 10, 183-189.

852
